# Supplementary material for: Time to progression of pancreatic ductal adenocarcinoma from low-to-high tumour stages
Source: PubMed Central journal article supplement — Gut. 2015 Jan 30;64(11):1783–9. doi: 10.1136/gutjnl-2014-308653 (PMC4520782; doi:10.1136/gutjnl-2014-308653), 2015-01-30
Supplement: NIHMS695074-supplement-Supplemental_files.pdf [file NIHMS695074-supplement-Supplemental_files.pdf]

## SUPPLEMENTAL DATA

### Supplemental Table 1

#### AJCC Pancreatic Cancer Staging 7<sup>th</sup> edition

##### Anatomic Stage/Prognostic Groups

|           |       |       |    |
|-----------|-------|-------|----|
| Stage 0   | Tis   | N0    | M0 |
| Stage IA  | T1    | N0    | M0 |
| Stage IB  | T2    | N0    | M0 |
| Stage IIA | T3    | N0    | M0 |
| Stage IIB | T1    | N1    | M0 |
|           | T2    | N1    | M0 |
|           | T3    | N1    | M0 |
| Stage III | T4    | Any N | M0 |
| Stage IV  | Any T | Any N | M1 |

##### Definitions

###### Primary Tumor (T)

|     |                                                                                                                |
|-----|----------------------------------------------------------------------------------------------------------------|
| Tx  | Primary tumor cannot be assessed                                                                               |
| T0  | No evidence of primary tumor                                                                                   |
| Tis | Carcinoma in situ                                                                                              |
| T1  | Tumor limited to the pancreas, 2 cm or less in greatest dimension                                              |
| T2  | Tumor limited to the pancreas, more than 2 cm in greatest dimension                                            |
| T3  | Tumor extends beyond the pancreas but without involvement of the celiac axis or the superior mesenteric artery |
| T4  | Tumor involves the celiac axis or the superior mesenteric artery (unresectable primary tumor)                  |

###### Regional lymph nodes (N)

|    |                                         |
|----|-----------------------------------------|
| Nx | Regional lymph nodes cannot be assessed |
| N0 | No regional lymph node metastasis       |
| N1 | Regional lymph node metastasis          |

###### Distant Metastasis (M)

|    |                       |
|----|-----------------------|
| M0 | No distant metastasis |
| M1 | Distant metastasis    |

## Supplemental Table 2

Estimates from multiple linear regression models for age, adjusting for patient race, sex, tumor location and grade among patients with stage IV disease only (first column) and all stages (second column). Separate models were estimated for varying subgroups of patient stage of disease. Values given are mean differences in ages by T stage, with 95% confidence intervals.

| Stage IV                      | Stages I to IV               |
|-------------------------------|------------------------------|
| 63.75 [61, 66.49]             | 61.43 [60.23, 62.63]         |
| -0.16 [-2.48, 2.16], P = 0.89 | 0.54 [-0.41, 1.49], P = 0.26 |
| -1.74 [-4.03, 0.54], P = 0.14 | 0.5 [-0.38, 1.39], P = 0.26  |
| -1.8 [-4.14, 0.54], P = 0.13  | 0.49 [-0.48, 1.45], P = 0.33 |

Supplemental Table 3: Estimates from a multiple linear regression model for age, adjusting for patient race, sex, tumor location and grade. All patients were included in the models. Values given are mean differences in ages by clinical stage and T stage, with 95% confidence intervals.

|                                       |                                  |
|---------------------------------------|----------------------------------|
| Adjusted Mean Age (years), Stage IA   | 61.23 [59.86, 62.61]             |
| Age difference (years): IB v IA       | -0.19 [-1.53, 1.16], P = 0.79    |
| Age difference (years): IIA v IA      | 1.67 [0.46, 2.87], P = 0.007     |
| Age difference (years): IIB, T1 v IA  | -0.9 [-2.9, 1.1], P = 0.38       |
| Age difference (years): IIB, T2 v IA  | -0.37 [-1.77, 1.03], P = 0.6     |
| Age difference (years): IIB, T3 v IA  | 0.28 [-0.87, 1.43], P = 0.63     |
| Age difference (years): III v IA      | 0.81 [-0.45, 2.06], P = 0.21     |
| Age difference (years): IV, T1 v IA   | 2.14 [-0.21, 4.5], P = 0.07      |
| Age difference (years): IV, T2 v IA   | 1.93 [0.64, 3.22], P = 0.003     |
| Age difference (years): IV, T3 v IA   | 0.34 [-0.89, 1.58], P = 0.59     |
| Age difference (years): IV, T4 v IA   | 0.37 [-0.96, 1.7], P = 0.58      |
| <hr/>                                 |                                  |
| Adjusted Mean Age (years), Stage IB   | 61.05 [59.87, 62.22]             |
| Age difference (years): IA v IB       | 0.19 [-1.16, 1.53], P = 0.79     |
| Age difference (years): IIA v IB      | 1.85 [0.91, 2.8], P = 1e-04      |
| Age difference (years): IIB, T1 v IB  | -0.71 [-2.57, 1.14], P = 0.45    |
| Age difference (years): IIB, T2 v IB  | -0.19 [-1.37, 1], P = 0.76       |
| Age difference (years): IIB, T3 v IB  | 0.47 [-0.41, 1.34], P = 0.3      |
| Age difference (years): III v IB      | 0.99 [-0.02, 2], P = 0.05        |
| Age difference (years): IV, T1 v IB   | 2.33 [0.1, 4.56], P = 0.04       |
| Age difference (years): IV, T2 v IB   | 2.12 [1.07, 3.17], P < 0.0001    |
| Age difference (years): IV, T3 v IB   | 0.53 [-0.46, 1.51], P = 0.29     |
| Age difference (years): IV, T4 v IB   | 0.56 [-0.54, 1.66], P = 0.32     |
| <hr/>                                 |                                  |
| Adjusted Mean Age (years), Stage IIA  | 62.9 [61.84, 63.97]              |
| Age difference (years): IA v IIA      | -1.67 [-2.87, -0.46], P = 0.007  |
| Age difference (years): IB v IIA      | -1.85 [-2.8, -0.91], P = 1e-04   |
| Age difference (years): IIB, T1 v IIA | -2.57 [-4.31, -0.82], P = 0.004  |
| Age difference (years): IIB, T2 v IIA | -2.04 [-3.05, -1.03], P < 0.0001 |
| Age difference (years): IIB, T3 v IIA | -1.39 [-1.99, -0.79], P < 0.0001 |
| Age difference (years): III v IIA     | -0.86 [-1.65, -0.07], P = 0.03   |
| Age difference (years): IV, T1 v IIA  | 0.48 [-1.66, 2.62], P = 0.66     |
| Age difference (years): IV, T2 v IIA  | 0.26 [-0.59, 1.11], P = 0.54     |
| Age difference (years): IV, T3 v IIA  | -1.33 [-2.09, -0.56], P = 7e-04  |
| Age difference (years): IV, T4 v IIA  | -1.3 [-2.21, -0.39], P = 0.005   |

Supplemental Table 4:

Estimates from a multiple linear regression model for age, adjusting for patient race, sex, tumor location and grade, among patients with stage I, II or III disease only. Values given are mean differences in ages by tumor size and stage of disease, with 95% confidence intervals.

|                                                        |                               |
|--------------------------------------------------------|-------------------------------|
| <u>Adjusted Mean Age (years), Stage IB</u>             | <u>60.63 [59.32, 61.94]</u>   |
| Age difference (years): IA v IB                        | 0.15 [-1.17, 1.46], P = 0.83  |
| Age difference (years): IIA, <= 2cm v IB               | 1.65 [0.25, 3.05], P = 0.02   |
| Age difference (years): IIA, 2-4 cm v IB               | 2.23 [1.21, 3.26], P < 0.0001 |
| Age difference (years): IIA, > 4cm v IB                | 1.24 [-0.03, 2.5], P = 0.05   |
| Age difference (years): IIB, <= 2cm v IB               | -0.32 [-1.45, 0.8], P = 0.58  |
| Age difference (years): IIB, 2-4 cm v IB               | 0.7 [-0.19, 1.59], P = 0.12   |
| Age difference (years): IIB, > 4cm v IB                | 0.06 [-0.92, 1.05], P = 0.9   |
| Age difference (years): III, <= 2cm v IB               | 1.54 [-0.82, 3.89], P = 0.2   |
| Age difference (years): III, 2-4 cm v IB               | 0.92 [-0.27, 2.1], P = 0.13   |
| Age difference (years): III, > 4cm v IB                | 1.15 [-0.02, 2.32], P = 0.05  |
| <u>Adjusted Mean Age (years), Stage IIB, &lt;= 2cm</u> | <u>60.31 [58.91, 61.71]</u>   |
| Age difference (years): IA v IIB, <= 2cm               | 0.47 [-0.87, 1.81], P = 0.49  |
| Age difference (years): IB v IIB, <= 2cm               | 0.32 [-0.8, 1.45], P = 0.58   |
| Age difference (years): IIA, <= 2cm v IIB, <= 2cm      | 1.98 [0.58, 3.37], P = 0.006  |
| Age difference (years): IIA, 2-4 cm v IIB, <= 2cm      | 2.56 [1.53, 3.58], P < 0.0001 |
| Age difference (years): IIA, > 4cm v IIB, <= 2cm       | 1.56 [0.28, 2.84], P = 0.02   |
| Age difference (years): IIB, 2-4 cm v IIB, <= 2cm      | 1.02 [0.14, 1.9], P = 0.02    |
| Age difference (years): IIB, > 4cm v IIB, <= 2cm       | 0.39 [-0.61, 1.38], P = 0.45  |
| Age difference (years): III, <= 2cm v IIB, <= 2cm      | 1.86 [-0.5, 4.21], P = 0.12   |
| Age difference (years): III, 2-4 cm v IIB, <= 2cm      | 1.24 [0.05, 2.42], P = 0.04   |
| Age difference (years): III, > 4cm v IIB, <= 2cm       | 1.47 [0.29, 2.65], P = 0.01   |
